# Supplementary material
Source: PubMed Central journal article supplement (PMC4793824)
Supplement: chab020902.wt1_default.pdf [file chab020902.wt1_default.pdf]

**Figure 1** Covariates included in the different analytic models

| <b>Model 1</b>                                                                                                                                                                                                                                                                                                                                                                                                                                                                                                           | <b>Model 2</b>                                                                                                                                                                                                                                             |                                                                                                                                            |                                                                    |                                                                                              |
|--------------------------------------------------------------------------------------------------------------------------------------------------------------------------------------------------------------------------------------------------------------------------------------------------------------------------------------------------------------------------------------------------------------------------------------------------------------------------------------------------------------------------|------------------------------------------------------------------------------------------------------------------------------------------------------------------------------------------------------------------------------------------------------------|--------------------------------------------------------------------------------------------------------------------------------------------|--------------------------------------------------------------------|----------------------------------------------------------------------------------------------|
| Base Model                                                                                                                                                                                                                                                                                                                                                                                                                                                                                                               | Base Model + Disease Category Risk Factors                                                                                                                                                                                                                 |                                                                                                                                            |                                                                    |                                                                                              |
|                                                                                                                                                                                                                                                                                                                                                                                                                                                                                                                          | Cancers                                                                                                                                                                                                                                                    | Cardiovascular                                                                                                                             | Digestive                                                          | Violent/accidental                                                                           |
| <ul style="list-style-type: none"> <li>•calendar time*</li> <li>•age*</li> <li>•BMI*</li> <li>•race</li> <li>•smoking status*</li> <li>•smoking amount/duration*</li> </ul>                                                                                                                                                                                                                                                                                                                                              | <ul style="list-style-type: none"> <li>•age at menarche</li> <li>•alcohol intake*</li> <li>•physical activity*</li> <li>•family history of breast cancer†</li> <li>•family history of colon cancer†</li> <li>•family history of ovarian cancer†</li> </ul> | <ul style="list-style-type: none"> <li>•alcohol intake*</li> <li>•physical activity*</li> <li>•family history of heart disease†</li> </ul> | <ul style="list-style-type: none"> <li>•alcohol intake*</li> </ul> | <ul style="list-style-type: none"> <li>•alcohol intake*</li> <li>•marital status*</li> </ul> |
| <b>Model 3</b>                                                                                                                                                                                                                                                                                                                                                                                                                                                                                                           | <b>Model 4</b>                                                                                                                                                                                                                                             |                                                                                                                                            |                                                                    |                                                                                              |
| Base Model +Mortality Risk Factors                                                                                                                                                                                                                                                                                                                                                                                                                                                                                       | Base Model + Disease Risk Factors                                                                                                                                                                                                                          |                                                                                                                                            |                                                                    |                                                                                              |
|                                                                                                                                                                                                                                                                                                                                                                                                                                                                                                                          | Breast Cancer                                                                                                                                                                                                                                              | Ovarian Cancer                                                                                                                             |                                                                    |                                                                                              |
| <ul style="list-style-type: none"> <li>•BMI at age 18</li> <li>•weight change since age 18</li> <li>•height</li> <li>•alcohol intake*</li> <li>•physical activity*</li> <li>•nut consumption</li> <li>•polyunsaturated fat</li> <li>•glycemic load</li> <li>•dietary cholesterol</li> <li>•cereal fiber</li> <li>•systolic blood pressure</li> <li>•use of blood pressure medications†</li> <li>•history of diabetes†</li> <li>•parental myocardial infarction before age 60†</li> <li>•time since menopause†</li> </ul> | <ul style="list-style-type: none"> <li>•parity†</li> <li>•age at first birth†</li> <li>•hormone therapy use*†</li> <li>•hormone therapy duration*†</li> <li>•history of benign breast disease*†</li> </ul>                                                 | <ul style="list-style-type: none"> <li>•parity†</li> <li>•tubal ligation*†</li> <li>•hysterectomy*†</li> </ul>                             |                                                                    |                                                                                              |

BMI=body mass index

\*Updated throughout follow-up.

†Covariate may have occurred only after oral contraceptive use ended.
